# Supplementary material for: Does high intelligence improve prognosis? The association of intelligence with recurrence and mortality among Swedish men with coronary heart disease
Source: HighWire-hosted journal article supplement (doi:10.1136/jech-2014-204958), 2014-12-08
Supplement: jech-2014-204958supp.pdf [file jech-2014-204958supp.pdf]

Supplementary Table S1. Covariates included in the main analyses.

| <b>Variable</b>                                                                              | <b>Categories</b>                                                                                                                                                                                                                                                                            | <b>Source of information and time of assessment</b>                                                                        |
|----------------------------------------------------------------------------------------------|----------------------------------------------------------------------------------------------------------------------------------------------------------------------------------------------------------------------------------------------------------------------------------------------|----------------------------------------------------------------------------------------------------------------------------|
| <i>Early life factors</i>                                                                    |                                                                                                                                                                                                                                                                                              |                                                                                                                            |
| Parental death with CVD as underlying cause before age 65.                                   | 1. Yes<br>2. No                                                                                                                                                                                                                                                                              | The national cause of death register 1961-2002                                                                             |
| Socioeconomic position in childhood; occupation of head of household (most often the father) | 1. Unskilled or skilled worker<br>2. Non-manual employees at assistant, intermediate or higher level<br>3. Farmers and self-employed (mostly skilled workers or drivers) and those for whom no occupation was reported (e.g. unemployed, early retired or disabled)                          | The national census 1960                                                                                                   |
| <i>Factors in adolescence</i>                                                                |                                                                                                                                                                                                                                                                                              |                                                                                                                            |
| BMI                                                                                          | Continuous variable                                                                                                                                                                                                                                                                          | Health examination at conscription 1969/70                                                                                 |
| Smoking                                                                                      | 1. No smoking<br>2. Smoking 1-10 cigarettes/day<br>3. Smoking >10 cigarettes/day                                                                                                                                                                                                             | Survey data at conscription 1969/70                                                                                        |
| Risk use of alcohol                                                                          | 1. Yes: an affirmative answer to any of the following: consuming $\geq 250$ g 100% alcohol/week, ever drinking an 'eye-opener' during a hangover, having been apprehended for drunkenness, or having 'often' been drunk (vs 'rather often', 'sometimes', or 'never')<br>2. None of the above | Survey data at conscription 1969/70                                                                                        |
| Systolic blood pressure                                                                      | Continuous variable                                                                                                                                                                                                                                                                          | Health examination at conscription 1969/70                                                                                 |
| <i>Factors in adulthood</i>                                                                  |                                                                                                                                                                                                                                                                                              |                                                                                                                            |
| Socioeconomic position at age about 40; occupation                                           | 1. Unskilled and skilled workers<br>2. Non-manual employees at assistant, intermediate and higher level<br>3. Farmers and self-employed (mostly skilled workers or drivers)<br>4. Those for whom no occupation was reported (e.g. unemployed, early retired or disabled)                     | Longitudinal Database of Education, Income and Occupation (LOUISE) 1990                                                    |
| Income                                                                                       | Continuous variable                                                                                                                                                                                                                                                                          | LOUISE 1990                                                                                                                |
| Single household                                                                             | 1. Married, registered partner or cohabitant<br>2. Single household                                                                                                                                                                                                                          | LOUISE 1990-2007 (renamed LISA, Longitudinal Integration Database for Health Insurance and Labour Market Studies, in 2004) |

*Cont'd*

| Variable                                                                              | Categories                                                                                                                                                                                                                                                                                                                                                                                                                                                                                                            | Source of information and time of assessment       |
|---------------------------------------------------------------------------------------|-----------------------------------------------------------------------------------------------------------------------------------------------------------------------------------------------------------------------------------------------------------------------------------------------------------------------------------------------------------------------------------------------------------------------------------------------------------------------------------------------------------------------|----------------------------------------------------|
| <i>Other diagnoses (four years preceding or within 28 days after first CHD event)</i> |                                                                                                                                                                                                                                                                                                                                                                                                                                                                                                                       |                                                    |
| Comorbidity                                                                           | 1. No comorbidity<br>2. Any of the following:<br>- Diabetes with complication (ICD-9: 250B-250H, 250X; ICD-10: E10.0–E10.8, E11.0–E11.8, E12.0–E12.8, E13.0–E13.8, E14.0–E14.8)<br>- Pulmonary edema (514, 518B; J18.2, J81)<br>- Acute or chronic renal failure (403-404, 584-586; N17-19, R34, T82.4, Z49.2, Z99.2)<br>- Cerebrovascular disease (430-438; G45-46, H34.0, I60-69)<br>- Malignancy (140-208; C00-C97)<br>- Depression (296B, 296D-E, 300E, 301B, 309, 311; F204, F313-315, F32-33. F341, F412, F432) | The national hospital discharge register 1987-2008 |
| Complications                                                                         | 1. No complication<br>2. Any of the following:<br>- Cardiogenic shock (ICD-9 785F; ICD-10 R57)<br>- Cardiac dysrhythmias (427; I44.1–I44.3, I45.6, I45.9, I46-49, R00.0, R00.1, R00.8, T82.1, Z45.0, Z95.0)<br>- Congestive heart failure (428; I09.9, I11.0, I13.0, I13.2, I25.5, I42.0, I42.5 – I42.9, I43, I50, P29.0).                                                                                                                                                                                            | The national hospital discharge register 1987-2008 |
